# Supplementary figures and images for: Detecting Human Gait Metabolism Disorders Based on A Novel Criticality Analysis Methodology
Source: Preprints.org preprint supplement (doi:10.20944/preprints202308.1685.v1), 2023-08-24

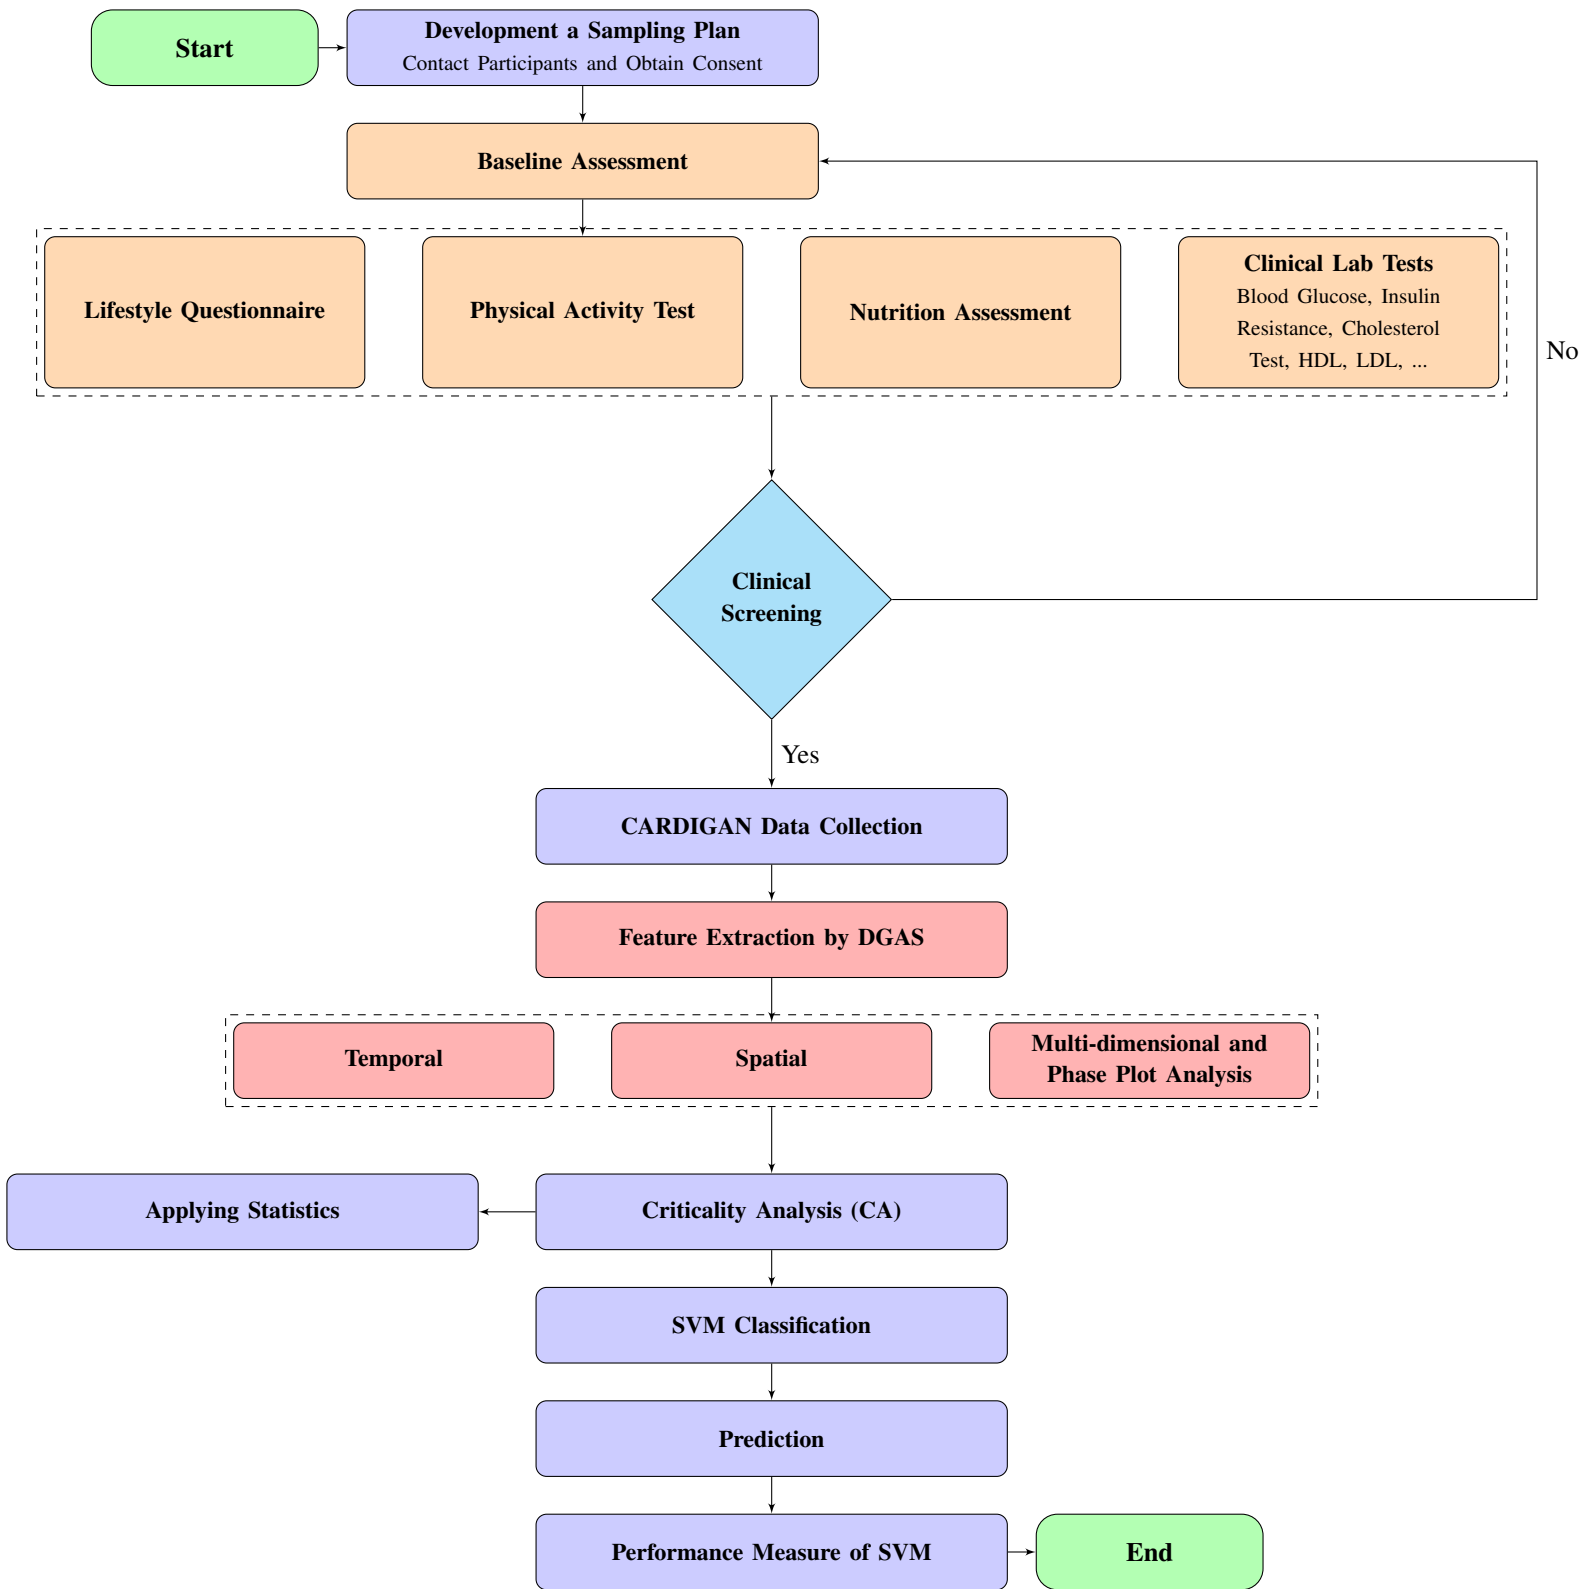

Supplement: Supplementary file 1 [file supplementary]
